# Supplementary material for: Heterogeneity of SOX9 and HNF1β in Pancreatic Ducts Is Dynamic
Source: PubMed Central journal article supplement — Stem Cell Reports. 2018 Mar 1;10(3):725–38. doi: 10.1016/j.stemcr.2018.01.028 (PMC5918495; doi:10.1016/j.stemcr.2018.01.028), 2018-03-01
Supplement: mmc1.pdf [file mmc1.pdf]

**Stem Cell Reports, Volume 10**

## **Supplemental Information**

### **Heterogeneity of SOX9 and HNF1 $\beta$ in Pancreatic Ducts Is Dynamic**

**Habib Rezanejad, Limor Ouziel-Yahalom, Charlotte A. Keyzer, Brooke A. Sullivan, Jennifer Hollister-Lock, Wan-Chun Li, Lili Guo, Shaopeng Deng, Ji Lei, James Markmann, and Susan Bonner-Weir**

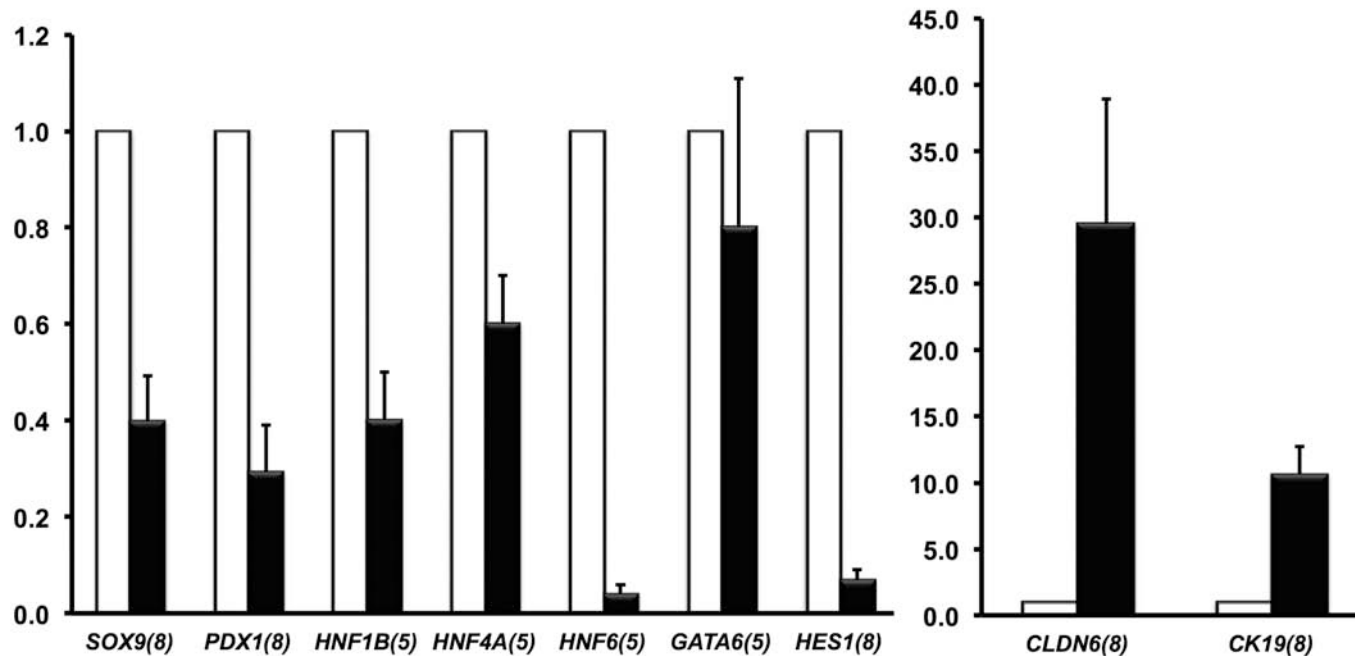

**Figure S1 related to Figure 5. Purified human ducts lose ductal characteristics when cultured 1 week as monolayers.** CA19.9 purified human ducts cultured as monolayer in CRML media for 1 wk (black bars) lose their ductal phenotype compared to the freshly isolated cells (white bars). The values are normalized to that of fresh ducts of the same donor; the number of donors in parentheses. The Ct values were: 20 for *HES*, 24 for *PDX1*, 20 for *SOX9* but embryonically expressed *claudin6* 25 for fresh but 19 for cultured. Mean $\pm$ sem.

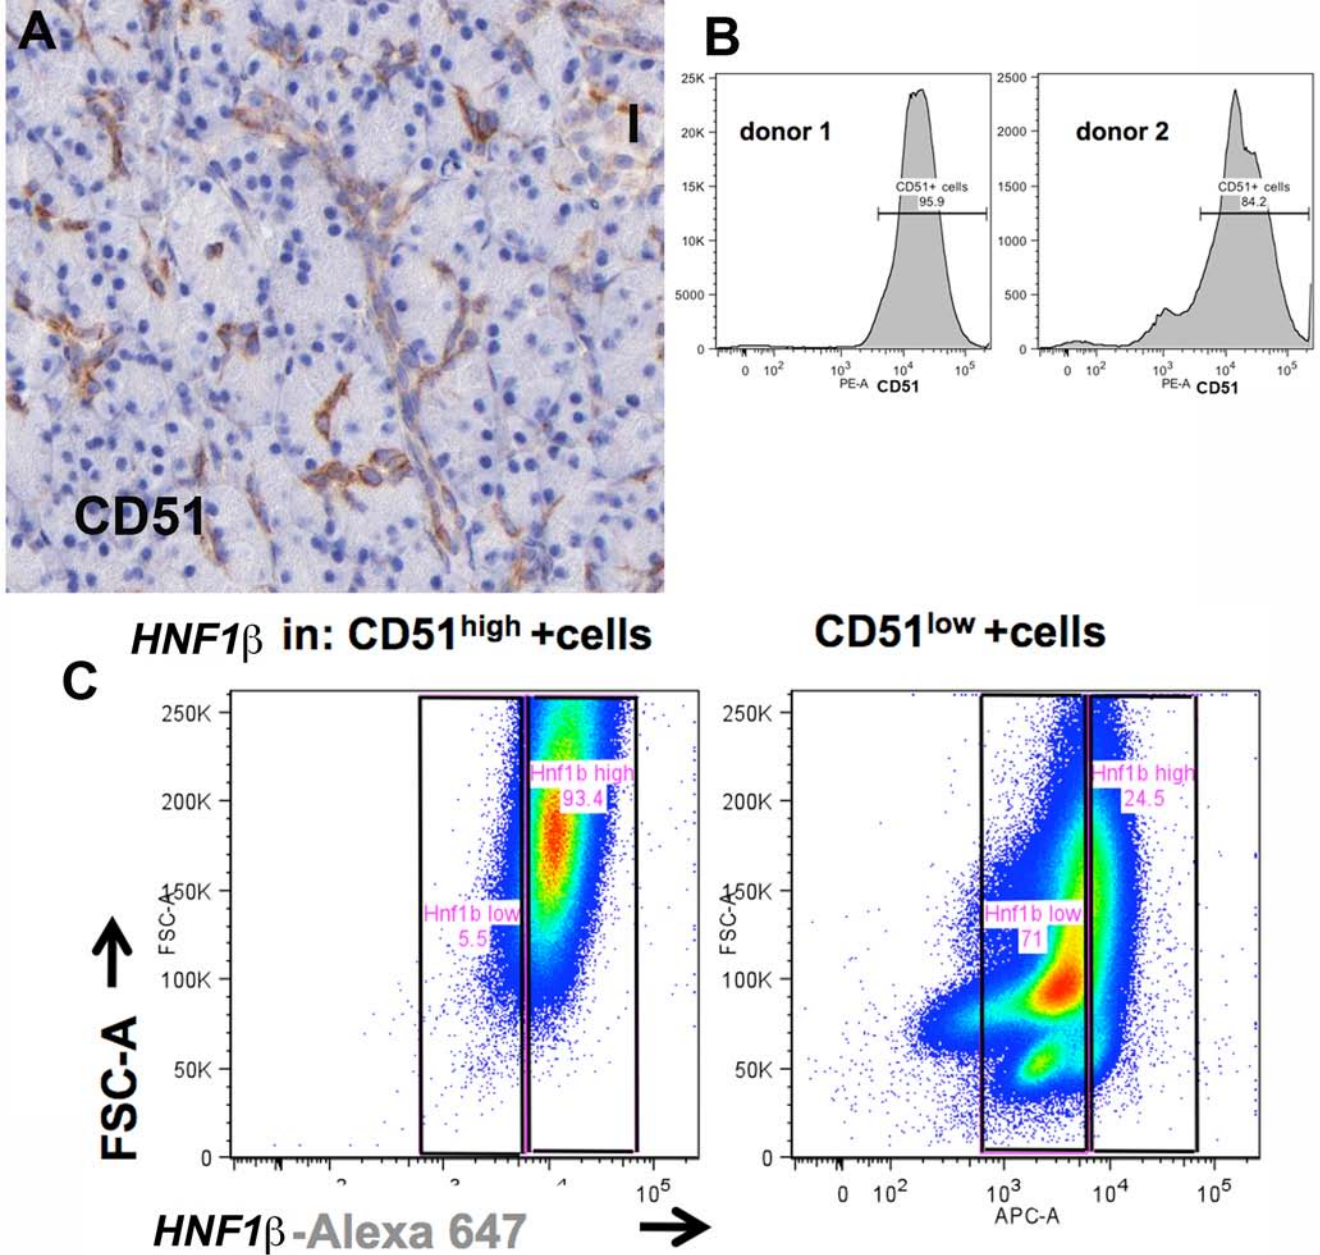

**Figure S2 related to Figure 6. CD51 as second antibody for sorting human pancreatic duct cells.** Based on our unpublished microarray data on human ducts (data not shown) and the immunostaining from the Human Protein Atlas (image from [www.proteinatlas.org](http://www.proteinatlas.org))(A), CD51 had a specific but variable expression in ducts. We tested CD51 for sorting CA19-9 purified human pancreatic duct cells (B). As shown for two donors, the overlap was high with 95.9 and 84.2% overlap. C. Combined with immunostaining for HNF1 $\beta$ , CD51 expression largely overlapped with HNF1 $\beta$  expression: 93.4% of CD51<sup>high</sup> cells expressed HNF1 $\beta$ <sup>high</sup>, and 71% of CD51<sup>low</sup> expressed HNF1 $\beta$ <sup>low</sup>

**A**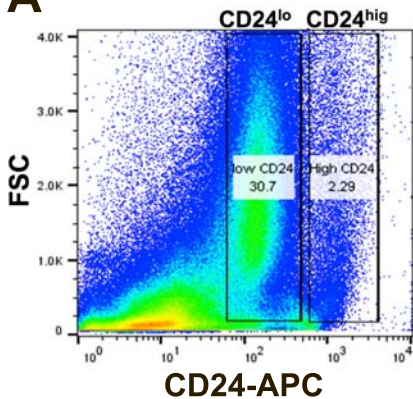**B**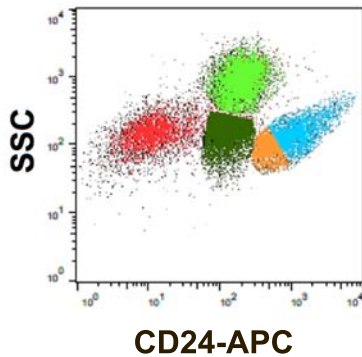**C**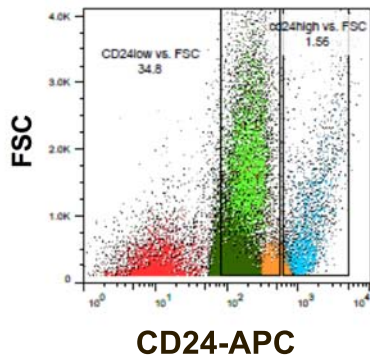**D**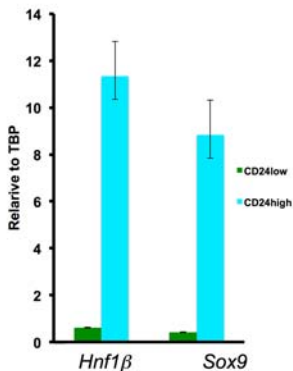

**Figure S3 related to Figure 6. Alternate sorting strategy also indicates at least two populations.** Mouse pancreatic ducts purified on basis of CD44<sup>+</sup> using MACs were analyzed by FACS for the second antibody CD24. As shown in **A**, when plotted as increasing CD24 expression vs forward scatter FSC (size) as our usual protocol, we could "arbitrarily" assign high or low CD24 populations. **B** shows the same preparation but plotted as CD24 vs side scatter SSC (granularity) has clearly separate populations: red - CD24<sup>negative</sup>granularity<sup>low</sup>, dark green-CD24<sup>low</sup>granularity<sup>low</sup>, light green CD24<sup>low</sup>granularity<sup>high</sup> and orange/aqua-CD24<sup>high</sup>granularity<sup>low</sup>. **C** shows the overlap when these populations are plotted by FSC. When the cells were sorted on basis of CD24 vs SSC as either the green or aqua+orange populations, there was enrichment of *Hnf1 $\beta$*  and *Sox9* mRNA in the CD24<sup>high</sup> population (**D**). n= 3 experiments Mean $\pm$ sem

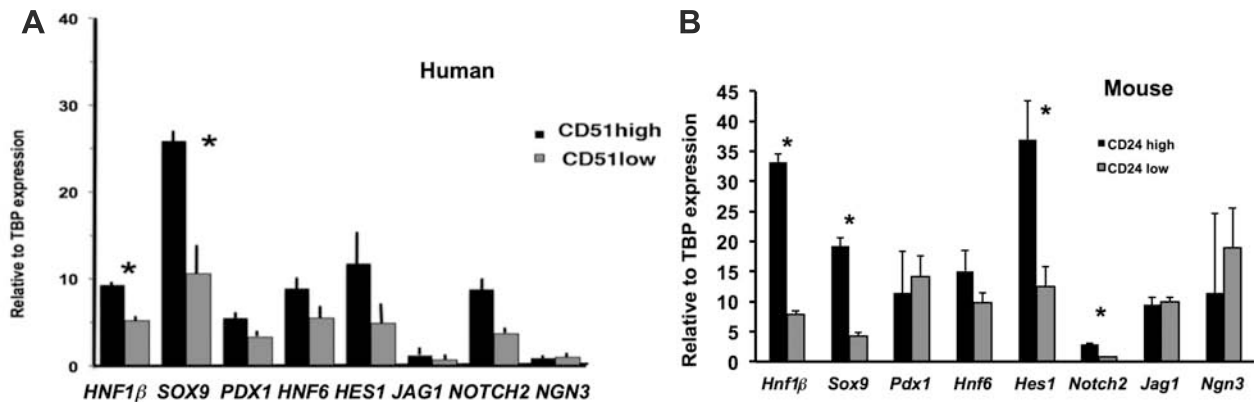

**Figure S4 related to Figure 6.** Gene expression in live pancreatic duct cells FACS sorted on the basis of 2 antibodies, first one to purify duct cells from islet-depleted tissue and second one to sort distinct subpopulations. **A.** Human duct cells were purified as CA19-9+ and subsequently incubated with CD51-PE and FACS sorted for CD51<sup>high</sup> and CD51<sup>low</sup> populations and finally their gene expression was analyzed by qPCR. Human pancreas donors (n=3), normalized to *TBP*. **B.** A second independent set of gene expression experiments on mouse duct cells purified by CD44 and the sorted for CD24<sup>high</sup> and CD24<sup>low</sup> using a different CD24-Pe antibody than in Figure 6. n=3 independent experiments, each pooled from 15 mouse pancreas; values normalized to *Tbp*. Mean  $\pm$  sem

**Table S1. Related to Experimental Procedures. Optimized organogenesis media for growing mouse pancreatic duct cell-derived organoids**

| <b>Reagent</b>                  | <b>Concentration</b> |
|---------------------------------|----------------------|
| Advanced DMEM/F12               | 50%                  |
| L-NRW cell line condition media | 50%                  |
| Penicillin/Streptomycin         | 1X                   |
| FBS                             | 10%                  |
| Glutamax                        | 1X                   |
| FGF10                           | 50 ng/ml             |
| EGF                             | 50 ng/ml             |
| Nicotinamide                    | 10 mM                |

**Table S2. Related to Figure 6. Gating on CD24 expression of mouse CD44<sup>+</sup> purified duct cells gave distinct subpopulations.**

|                                       | <b>CD24<sup>high</sup></b> | <b>CD24<sup>low</sup></b> |
|---------------------------------------|----------------------------|---------------------------|
| % HNF1 $\beta$ <sup>high</sup>        | 73.8                       | 55.8                      |
| %HNF1 $\beta$ <sup>low</sup>          | 24.7                       | 34.7                      |
| %HNF1 $\beta$ <sup>undetectable</sup> | 0.06                       | 6.7                       |
|                                       |                            |                           |
| %SOX9 <sup>high</sup>                 | 65.7                       | 9.9                       |
| %SOX9 <sup>low</sup>                  | 26.8                       | 76.4                      |
| % SOX9 <sup>undetectable</sup>        | 0.05                       | 9.6                       |

**Table S3. Related to Figure 6. CD24<sup>low/high</sup> subpopulations percentage between young and old mice. CD24<sup>low</sup> cells were twice as abundant in the younger animals.**

| <b>Age</b>      | <b>CD24 level</b>    | <b>Percentage</b> |
|-----------------|----------------------|-------------------|
| Young (7-9 wks) | CD24 <sup>low</sup>  | 18.6              |
|                 | CD24 <sup>high</sup> | 1.2               |
| Old (7-9 month) | CD24 <sup>low</sup>  | 8.7               |
|                 | CD24 <sup>high</sup> | 1.2               |
| Old (1+year)    | CD24 <sup>low</sup>  | 7.9               |
|                 | CD24 <sup>high</sup> | 2.5               |



**Table S4. Related to Experimental Procedures. Primary antibodies used for different experiments**

| <b>Application</b>         | <b>Name</b>                                   | <b>Derived species</b> | <b>Vendor</b>     | <b>Catalogue #</b> | <b>Dilution (Method)</b> |
|----------------------------|-----------------------------------------------|------------------------|-------------------|--------------------|--------------------------|
| <b>Duct cell isolation</b> | CD24, clone M1/69                             | Rat                    | eBioscience       | 17-0242            | 1:100 (IMS)              |
|                            | CD44                                          | Rat                    | eBioscience       | 11-0441            | 1:100 (IMS)              |
|                            | CA19-9                                        | Mouse                  | Invitrogen        | MA5-12421          | 1:100 (IMS)              |
| <b>FACS</b>                | HNF1 $\beta$                                  | Rabbit                 | Santa Cruz        | SC8986             | 1:150 (PF)               |
|                            | SOX9                                          | Rabbit                 | Millipore         | AB5535             | 1:1000 (PF)              |
|                            | Fluorochrome-Conjugated-CD44clone IM7 PE      | Rat                    | eBioscience       | 11-0441            | 1:100                    |
|                            | Fluorochrome-Conjugated-CA19-9                | Mouse                  | Life Technologies | 18-7240            | 1:200                    |
|                            | Fluorochrome-Conjugated-CD24, clone M1/69 APC | Rat                    | eBioscience       | 17-0242            | 1:100                    |
|                            | Fluorochrome-Conjugated- CD51                 | Mouse                  | eBioscience       | 12-0512            | 1:100                    |
|                            | CD16/CD32                                     | Rat                    | BD                | 553142             | 1:100                    |
| <b>IHC</b>                 | HNF1 $\beta$                                  | Rabbit                 | Santa Cruz        | SC22840; SC8986    | 1:150 (PF)               |
|                            | HNF1 $\beta$                                  | Goat                   | Santa Cruz        | SC7411             | 1:100 (PF)               |
|                            | SOX9                                          | Rabbit                 | Millipore         | AB5535             | 1:1000 (PF)              |
|                            | BrdU                                          | Mouse                  | Dako              | M0744              | 1:100 (PF)               |
|                            | PanCK                                         | Rabbit                 | Dako              | Z0622              | 1:300 (PF)               |
| <b>Organoid staining</b>   | SOX9                                          | Rabbit                 | Millipore         | AB5535             | 1:200 (WM,Bio-SA)        |
|                            | HNF1 $\beta$                                  | Rabbit                 | Santa Cruz        | SC8986             | 1:200 (WM,Bio-SA)        |
|                            | HNF6                                          | Rabbit                 | Santa Cruz        | 13050              | 1:200 (WM,Bio-SA)        |
|                            | Ki67                                          | Mouse                  | BD Pharmigen      | 556003             | 1:200 (WM,FITC)          |

Abbreviations: IMS, Immunomagnetic Separation. Bio-SA, biotin-streptavidin-conjugated fluorescein amplification. PF, Paraffin Fixed. WM, Whole mount staining.

**Table S5. Related to Experimental Procedures. MCDB131 media was supplemented with compounds listed for each stage (S1-S4) for differentiation of pancreatic duct cells-derived organoids to pancreatic progenitor cells.**

| Compound                               | Provider           | Cat#              | S1(d1-3) | S2(d3-6) | S3(d6-9) | S4 (d9-14)        |
|----------------------------------------|--------------------|-------------------|----------|----------|----------|-------------------|
| Sodium bicarbonate                     | Sigma              | S6297             | 2.5 g/l  | 2.5 g/l  | 1.5 g/l  | 1.5 g/l           |
| Glutamax                               | Life Technologies  | 35050-061         | 1x       | 1x       | 1x       | 1x                |
| Glucose                                | Sigma              | G8769             | 10 mM    | 10 mM    | 20 mM    | 20 mM             |
| BSA                                    | Sigma              | A2934             | 2%       | 2%       | 2%       | 2%                |
| Ascorbic acid                          | Sigma              | A4544             | 0.25 mM  | 0.25 mM  | -        | -                 |
| FGF7                                   | R & D Systems      | 251-KG            | 50 ng/ml | 2 ng/ml  | -        | -                 |
| SANT-1                                 | Sigma              | S4572             | 0.25 mM  | 0.25 mM  | 0.25 mM  | -                 |
| Retinoic acid                          | Sigma              | R2625             | 1 mM     | 0.1 mM   | 0.05 mM  | -                 |
| Stemolecule™ LDN-193189                | Stemgent           | 04-0019           | 100 nM   | 200 nM   | 100 nM   | 100 nM            |
| Insulin-Transferrin-Selenium (ITS)     | Life Technologies  | 51500056          | 1:200    | 1:200    | 1:200    | 1:200             |
| PKC activator (TPB)                    | EMD Millipore      | 565740            | 200 nM   | 100 nM   | -        | -                 |
| 3,3',5-Triiodo-L-thyronine sodium (T3) | Sigma              | T6397             | -        | -        | 1mM      | 1mM               |
| ALK5 inhibitor II                      | Enzo Life Sciences | AL X-270-445-M005 | -        | -        | 10 mM    | 10 mM             |
| Zinc sulfate                           | Sigma              | Z0251             | -        | -        | 10 mM    | 10 mM             |
| Heparin                                | Sigma              | H3149             | -        | -        | 10 mg/ml | 10 mg/ml (d12-14) |
| γ-secretase inhibitor XX               | EMD Millipore      | 565789            | -        | -        | -        | 100 nM (d9-12)    |

**Table S6. List of Primers, related to Experimental Procedures**

| <b>Primer</b>                 | <b>Sequence 5' to 3' forward</b>  | <b>reverse</b>            |
|-------------------------------|-----------------------------------|---------------------------|
| <b>Human</b>                  |                                   |                           |
| <i>SOX9</i>                   | AAAGGCAACTCGTACCCAAATTT           | AGTGGGTAATGCGCTTGGAT      |
| <i>PDX1</i>                   | CTGGATTGGCGTTGTTTGTG              | CCAAGGTGGAGTGCTGTAGGA     |
| <i>HNF1<math>\beta</math></i> | AGAAGCGTGCCGCTCTGT                | GAATTGTCGGAGGATCTCTCGTT   |
| <i>HNF4a</i>                  | CTGCAGGCTCAAGAAATGCTT             | TCATTCTGGACGGCTTCCTT      |
| <i>GATA6</i>                  | AGCGCGTGCCTTCATCA                 | GTGGTAGTTGTGGTGTGACAGTTG  |
| <i>HES1</i>                   | TCCGGAGCTGGTGCTGAT                | CCAGGACCAAGGAGAGAGGTAGA   |
| <i>CK19</i>                   | GAAGGATGCTGAAGCCTGGTT             | GCGACCTCCCGGTTCAAT        |
| <i>HNF6</i>                   | GCAGGAAAACACCACTGGATCT            | GCCAAGCACAGCGAGGAT        |
| <i>JAG1</i>                   | AAAGATCTCAATTACTGTGGGACTCA        | AGGGCCTGTGTTGCTACAAGTT    |
| <i>NGN3</i>                   | TTTTGCGCCGGTAGAAAGG               | CTCACGGGTCACCTGGACAGT     |
| <i>NOTCH 2</i>                | CCTTTTAGATGATAATGGACAACCTATAGACTT | TGCCAAGAGCATGAATACAGAGA   |
| <i>CLDN6</i>                  | GGA TCT TGA CAT GCC CAT CTT AG    | CAA GCA GCC TCC GCA TTA G |
| <i>RPLP0</i>                  | CATCTACAACCCTGAAGTGCTTGA          | ACCCTCCAGGAAGCGAGAAT      |
| <i>PPIA</i>                   | GCGTCTCCTTTGAGCTGTTTG             | CAGTGCTCAGAGCACGAAAATT    |
| <i>TBP</i>                    | GCTTCCGCTGGCCATA                  | ACGCCAAGAAACAGTGATGCT     |
|                               |                                   |                           |
| <b>Mouse</b>                  |                                   |                           |
| <i>Sox9</i>                   | CGGCTCCAGCAAGAACAAG               | GCGCCACACCATGAAG          |
| <i>Pdx1</i>                   | GATGTTGAACTTGACCGAGAGA            | GTCCCGCTACTACGTTTCTTATC   |
| <i>Hnf1<math>\beta</math></i> | CCTCTCTCAACACCTCAACAAG            | GAGGATCTCCCGTTGCTTTC      |
| <i>Hnf4a</i>                  | CAAGAGGTCCATGGTGTTTAAGG           | GTGCCGAGGGACGATGTAGT      |
| <i>Hes1</i>                   | ACCCAGCCAGTGTCAACA                | TGTGCTCAGAGGCCGTCTT       |
| <i>Nkx6.1</i>                 | CTTCTGGCCCGGAGTGATG               | GGGTCTGGTGTGTTTTCTCTTC    |
| <i>Call</i>                   | CGATCCTTGCTCCCTTCTTC              | CACGATCCAGGTCACACATT      |
| <i>Hnf6</i>                   | AAGTCCCTCACCAT CATCAC             | AGTGTGAAACTACCGCTCAC      |
| <i>Pena</i>                   | CTCCGCCACCATGTTTGAG               | CAGCACCTTCTTCAGGATGGA     |
| <i>Delk1</i>                  | CAGCCTGGACGAGCTGGTGG              | TGACCAGTTGGGGTTCACAT      |
| <i>CD71</i>                   | GAAGTCCAGTGTGGGAACAGGT            | CAACCACTCAGTGGCACCAACA    |
| <i>Mafb</i>                   | GCCTTCTTCTCCAGCTTCA               | ATCCAGTACAGGTCCTCGAGATG   |
| <i>Jag1</i>                   | ACACAGGGATTGCCCACTTC              | AGCCAAAGCCATAGTAGTGGTCAT  |
| <i>Ngn3</i>                   | CAGTCACCACTTCTGCTTC               | GAGTCGGGAGAACTAGGATG      |
| <i>Notch 2</i>                | AGAGATGGAAGTGCCTATCACACA          | GGACGGGACGTCTCTTCATTT     |
| <i>Tbp</i>                    | CTGGCGGTTTGGCTAGGTT               | TGGGCACTGCGGAGAAA         |
